# Supplementary material
Source: HighWire-hosted journal article supplement (http://ajnr-stage2.highwire.org/highwire/filestream/52134/field_highwire_adjunct_files/0/1767_tables.pdf)
Supplement: 1767_tables.pdf [file 1767_tables.pdf]

**On-line Table 1: Brain abnormalities diagnosed on iuMR in the gestational age range of 20–24 weeks**

| Case | Gestation (weeks) | Trigones (mm) | Other Diagnosis on iuMR                | Effect on Management |                    |
|------|-------------------|---------------|----------------------------------------|----------------------|--------------------|
|      |                   |               |                                        | Rev 1 <sup>a</sup>   | Rev 2 <sup>a</sup> |
| 1    | 24                | 11,10         | Cerebellar hypoplasia                  | 3                    | 1                  |
| 2    | 24                | 11,6          | Unilateral schizencephaly              | 4                    | 4                  |
| 3    | 20                | 11,9          | Agenesis CC, neocortical malformation  | 4                    | 4                  |
| 4    | 22                | 12,12         | Absent septum pellucidum, turricephaly | 3                    | 1                  |
| 5    | 22                | 12,9          | Agenesis CC                            | 4                    | 4                  |
| 6    | 23                | 13,13         | Agenesis CC                            | 4                    | 4                  |
| 7    | 21                | 15,15         | Agenesis CC                            | 2                    | 2                  |
| 8    | 24                | 19,17         | Agenesis CC                            | 2                    | 2                  |
| 9    | 24                | 26,27         | Hydranencephaly                        | 2                    | 1                  |

**Note:**—CC indicates corpus callosum; iuMR, in utero MR imaging; Rev 1, reviewer 1; Rev 2, reviewer 2.

<sup>a</sup> The 4 grades of effects on management listed in the last 2 columns were defined as follows: 1, iuMR provided information that did not change the management or the information given to the woman; 2, iuMR provided additional information about the fetal brain that was discussed with the woman but did not alter management; 3, iuMR gave additional information that affected either management/treatment and/or prognosis, but not to a degree to warrant offering termination of pregnancy; 4, iuMR gave additional information that significantly altered prognosis to a degree that termination of pregnancy was offered.

**On-line Table 2: Brain abnormalities diagnosed on iuMR in the gestational age range of 25+ weeks**

| Case           | Gestation (weeks) | Trigones (mm)       | Other Diagnosis on iuMR               | Effect on Management |                    |
|----------------|-------------------|---------------------|---------------------------------------|----------------------|--------------------|
|                |                   |                     |                                       | Rev 1 <sup>a</sup>   | Rev 2 <sup>a</sup> |
| 1              | 31                | 12,10               | Agenesis CC, neocortical malformation | 4                    | 4                  |
| 2 <sup>b</sup> | 28                | 15,12               | Bilateral schizencephaly, SOD         | 2                    | 2                  |
| 3              | 30                | 16,16               | Agenesis CC                           | 2                    | 1                  |
| 4 <sup>c</sup> | 25                | 17,4                | Hemimegalencephaly                    | 4                    | 4                  |
| 5              | 35                | 17:16               | Multicystic PVL                       | 2                    | 2                  |
| 6              | 33                | 17,17               | Agenesis CC                           | 2                    | 2                  |
| 7              | 25                | 17,17               | Agenesis CC, neocortical malformation | 2                    | 2                  |
| 8              | 31                | 18,18               | Schizencephaly                        | 2                    | 2                  |
| 9              | 34                | 19,12               | IC and IV hemorrhage                  | 2                    | 2                  |
| 10             | 33                | 19,15               | Agenesis CC, neocortical malformation | 2                    | 2                  |
| 11             | 34                | 23,21               | Agenesis CC                           | 2                    | 2                  |
| 12             | 30                | 23,22               | IC and IV hemorrhage                  | 2                    | 2                  |
| 13             | 38                | 26,4                | Hemimegalencephaly                    | 2                    | 1                  |
| 14             | 31                | 26,6                | Hemimegalencephaly                    | 2                    | 2                  |
| 15             | 34                | 29,15               | IC and IV hemorrhage                  | 2                    | 2                  |
| 16             | 37                | Severe <sup>d</sup> | Hydranencephaly                       | 2                    | 2                  |

**Note:**—IC indicates intracerebral; IV, intraventricular; SOD, septo-optic dysplasia; PVL, periventricular leukomalacia.

<sup>a</sup> The 4 grades of effects on management listed in the last 2 columns were defined as follows: 1, iuMR provided information that did not change the management or the information given to the woman; 2, iuMR provided additional information about the fetal brain that was discussed with the woman but did not alter management; 3, iuMR gave additional information that affected either management/treatment and/or prognosis, but not to a degree to warrant offering termination of pregnancy; 4, iuMR gave additional information that significantly altered prognosis to a degree that termination of pregnancy was offered.

<sup>b</sup> A woman with documented oligohydramnios, which may have affected sonographic visualization.

<sup>c</sup> This case was referred with a 'hypoechoic lesion' and it was not possible to distinguish between unilateral ventriculomegaly or a cyst. No cyst was seen on iuMR, only unilateral ventriculomegaly due to hemimegalencephaly.

<sup>d</sup> Not possible to measure.
